# Supplementary material for: Effects of a Chimeric Lysin against Planktonic and Sessile Enterococcus faecalis Hint at Potential Application in Endodontic Therapy
Source: PubMed Central journal article supplement (PMC6024690; doi:10.3390/v10060290), 2018-05-29
Supplement: viruses-10-00290-s001.pdf [file viruses-10-00290-s001.pdf]

## Supplementary materials

### Effects of a chimeric lysin against planktonic and sessile *Enterococcus faecalis* hint potential application in endodontic therapy

Wuyou Li<sup>1,#</sup>, Hang Yang<sup>2,#,\*</sup>, Yujing Gong<sup>3</sup>, Shujuan Wang<sup>2</sup>, Yuhong Li<sup>1,\*</sup>, Hongping  
Wei<sup>2,\*</sup>

Table S1. Susceptibilities of *E. faecalis* ATCC 51299 to various antibiotics.

| Strain                           | MIC (µg/ml) |            |            |              |
|----------------------------------|-------------|------------|------------|--------------|
|                                  | Ampicillin  | Vancomycin | Daptomycin | Erythromycin |
| <i>E. faecalis</i><br>ATCC 51299 | 2           | 32         | >64        | >16          |
